# Supplementary material for: Advancing 3Rs: The Mouse Estrus Detector (MED) as a Low-Stress, Painless, and Efficient Tool for Estrus Determination in Mice
Source: Preprints.org preprint supplement (doi:10.20944/preprints202408.1091.v1), 2024-08-14
Supplement: Supplementary file 1 [file supplementary]

**Supplementary Materials**

**Advancing 3Rs: The Mouse Estrus Detector (MED) as a Low-Stress, Painless, and Efficient Tool for Estrus Determination in Mice**

Irina V. Belozertseva1, Dmitrijs D. Merkulovs2, Helena Kaiser3, Timofey S. Rozhdestvensky3* and Boris V. Skryabin3*

1 Valdman Institute of Pharmacology, Pavlov First Saint Petersburg State Medical University, L’va Tolstogo str. 6-8, St. Petersburg, 197022, Russia.

2 ELMI Ltd., Bukultu str. 7B, Riga, LV-1005, Latvia.

3 Core facility Transgenic animal and genetic engineering Models (TRAM); Medical Faculty, University of Münster, von-Esmarch str. 56, Münster, D-48149 Germany.


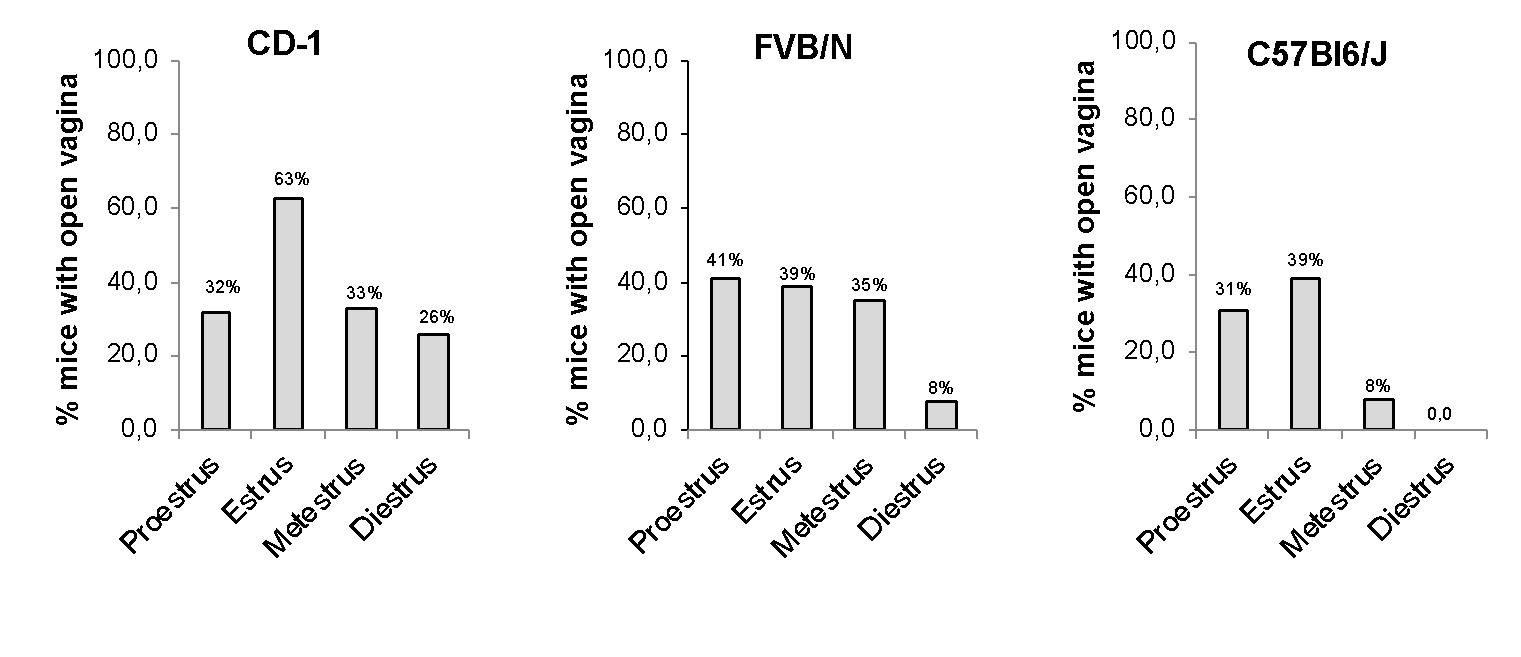


**Supplementary Fig. 1.** Ratio Between Vaginal Opening and Estrous Cycle Determination.

The percentages of animals per strain exhibiting vaginal opening at each stage of the estrous cycle, as determined by vaginal smear cytology, are shown. The total of 110 observations were performed for each strain.


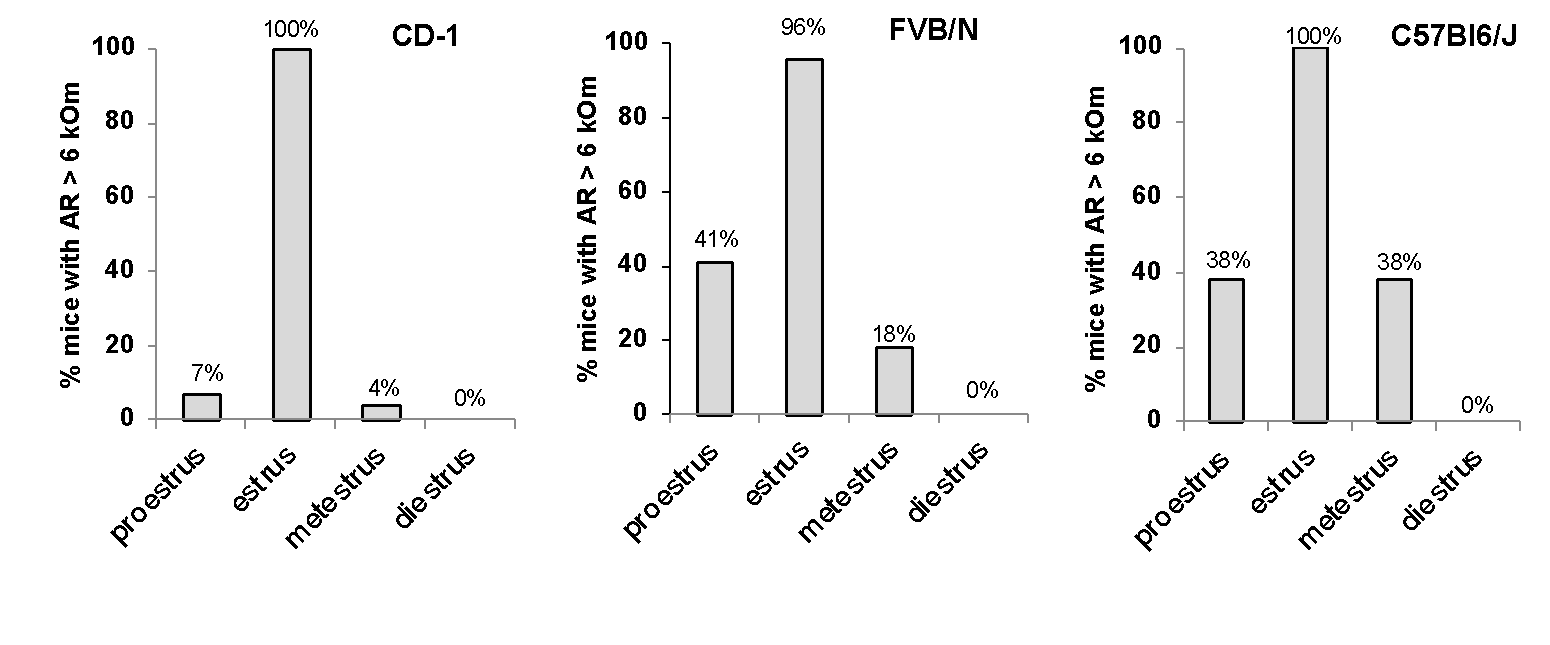


**Supplementary Fig. 2**. Ratio Between Vaginal Active Resistance (AR) measurements and Estrous Cycle Determination.

The percentages of animals per strain exhibiting AR > 6 kOm at each stage of the estrous cycle, as determined by vaginal smear cytology, are shown. The total of 110 measurements were performed for each strain.

**Supplementary Table 1.** Observational assessments of vaginal opening, AR measurements, and vaginal smear samples cytology (daily evaluations).

*Notations:*

PE - proestrus; E - estrus; M - Metestrus (Diestrus I); D - diestrus (Diestrus II)

o - open vagina; c - closed vagina.

| Strain | Mouse ID | DAY | STAGE (lavage) | AR (kOm)  (MEDPro) | Vagina |
| --- | --- | --- | --- | --- | --- |
| CD-1 | 11 | 1 | M | 2.8 | o |
| CD-1 | 11 | 2 | M | 2.2 | o |
| CD-1 | 11 | 3 | P | 2.2 | c |
| CD-1 | 11 | 4 | P | 1.6 | c |
| CD-1 | 11 | 5 | P | 1.7 | c |
| CD-1 | 11 | 6 | P | 1.5 | c |
| CD-1 | 11 | 7 | P | 1.5 | c |
| CD-1 | 11 | 8 | P | 1.8 | c |
| CD-1 | 11 | 9 | E | 9.4 | o |
| CD-1 | 11 | 10 | M | 2 | c |
| CD-1 | 11 | 11 | D | 3.7 | o |
| CD-1 | 12 | 1 | E | 24.5 | o |
| CD-1 | 12 | 2 | M | 2.5 | o |
| CD-1 | 12 | 3 | D | 2.7 | c |
| CD-1 | 12 | 4 | P | 9 | o |
| CD-1 | 12 | 5 | E | 10.9 | o |
| CD-1 | 12 | 6 | E | 24 | c |
| CD-1 | 12 | 7 | M | 3 | c |
| CD-1 | 12 | 8 | D | 2.4 | c |
| CD-1 | 12 | 9 | P | 4.7 | c |
| CD-1 | 12 | 10 | E | 8.4 | c |
| CD-1 | 12 | 11 | M | 5.6 | o |
| CD-1 | 13 | 1 | M | 2.4 | c |
| CD-1 | 13 | 2 | M | 2.4 | c |
| CD-1 | 13 | 3 | P | 3.4 | c |
| CD-1 | 13 | 4 | P | 13.9 | o |
| CD-1 | 13 | 5 | E | 8.2 | c |
| CD-1 | 13 | 6 | M | 2.5 | c |
| CD-1 | 13 | 7 | D | 2.8 | c |
| CD-1 | 13 | 8 | D | 2.8 | c |
| CD-1 | 13 | 9 | D | 2.2 | c |
| CD-1 | 13 | 10 | D | 1.4 | c |
| CD-1 | 13 | 11 | D | 1.4 | o |
| CD-1 | 14 | 1 | E | 11.5 | c |
| CD-1 | 14 | 2 | M | 2.2 | c |
| CD-1 | 14 | 3 | D | 3.8 | c |
| CD-1 | 14 | 4 | M | 2.5 | o |
| CD-1 | 14 | 5 | M | 2 | c |
| CD-1 | 14 | 6 | P | 1.8 | c |
| CD-1 | 14 | 7 | D | 1.7 | c |
| CD-1 | 14 | 8 | D | 2.1 | c |
| CD-1 | 14 | 9 | D | 1.4 | c |
| CD-1 | 14 | 10 | D | 0.9 | c |
| CD-1 | 14 | 11 | P | 3 | o |
| CD-1 | 15 | 1 | D | 3.4 | c |
| CD-1 | 15 | 2 | D | 2.1 | o |
| CD-1 | 15 | 3 | P | 2.6 | c |
| CD-1 | 15 | 4 | E | 10 | o |
| CD-1 | 15 | 5 | M | 1.7 | c |
| CD-1 | 15 | 6 | D | 3.2 | o |
| CD-1 | 15 | 7 | D | 3 | o |
| CD-1 | 15 | 8 | P | 4.9 | c |
| CD-1 | 15 | 9 | P | 4.4 | c |
| CD-1 | 15 | 10 | E | 19.5 | o |
| CD-1 | 15 | 11 | M | 2 | o |
| CD-1 | 21 | 1 | P | 2.3 | o |
| CD-1 | 21 | 2 | E | 10.8 | o |
| CD-1 | 21 | 3 | M | 9.8 | c |
| CD-1 | 21 | 4 | D | 2.5 | o |
| CD-1 | 21 | 5 | D | 3.3 | c |
| CD-1 | 21 | 6 | P | 4.5 | o |
| CD-1 | 21 | 7 | E | 16.8 | c |
| CD-1 | 21 | 8 | M | 5.1 | c |
| CD-1 | 21 | 9 | D | 3.1 | c |
| CD-1 | 21 | 10 | D | 2.8 | c |
| CD-1 | 21 | 11 | P | 1.9 | o |
| CD-1 | 22 | 1 | P | 5.6 | o |
| CD-1 | 22 | 2 | E | 20.5 | o |
| CD-1 | 22 | 3 | M | 2.5 | o |
| CD-1 | 22 | 4 | D | 2.5 | c |
| CD-1 | 22 | 5 | D | 2.3 | o |
| CD-1 | 22 | 6 | P | 4.7 | c |
| CD-1 | 22 | 7 | E | 17 | o |
| CD-1 | 22 | 8 | M | 2.2 | c |
| CD-1 | 22 | 9 | D | 2.6 | c |
| CD-1 | 22 | 10 | D | 2.5 | c |
| CD-1 | 22 | 11 | P | 2.4 | c |
| CD-1 | 23 | 1 | P | 2.1 | o |
| CD-1 | 23 | 2 | E | 15.3 | o |
| CD-1 | 23 | 3 | E | 6.5 | o |
| CD-1 | 23 | 4 | M | 3.4 | o |
| CD-1 | 23 | 5 | D | 2.3 | c |
| CD-1 | 23 | 6 | D | 1.5 | c |
| CD-1 | 23 | 7 | P | 5.2 | c |
| CD-1 | 23 | 8 | E | 8.6 | o |
| CD-1 | 23 | 9 | M | 3.5 | c |
| CD-1 | 23 | 10 | M | 2.2 | c |
| CD-1 | 23 | 11 | D | 2.1 | c |
| CD-1 | 24 | 1 | P | 2.5 | o |
| CD-1 | 24 | 2 | E | 19 | o |
| CD-1 | 24 | 3 | M | 1.3 | c |
| CD-1 | 24 | 4 | D | 1.3 | c |
| CD-1 | 24 | 5 | D | 1.1 | c |
| CD-1 | 24 | 6 | P | 0.9 | c |
| CD-1 | 24 | 7 | E | 16 | c |
| CD-1 | 24 | 8 | M | 5.6 | c |
| CD-1 | 24 | 9 | D | 2.3 | c |
| CD-1 | 24 | 10 | D | 2.2 | c |
| CD-1 | 24 | 11 | D | 1.8 | o |
| CD-1 | 25 | 1 | D | 2.2 | c |
| CD-1 | 25 | 2 | D | 1.9 | c |
| CD-1 | 25 | 3 | P | 1.5 | c |
| CD-1 | 25 | 4 | P | 1.1 | c |
| CD-1 | 25 | 5 | D | 1 | c |
| CD-1 | 25 | 6 | D | 2.2 | c |
| CD-1 | 25 | 7 | P | 2.5 | c |
| CD-1 | 25 | 8 | E | 12.9 | c |
| CD-1 | 25 | 9 | M | 1.7 | c |
| CD-1 | 25 | 10 | D | 2.9 | o |
| CD-1 | 25 | 11 | D | 2.6 | o |

| Strain | Mouse ID | DAY | STAGE (lavage) | AR (kOm) (MEDPro) | Vagina |
| --- | --- | --- | --- | --- | --- |
| FVB/N | 31 | 1 | D | 3.8 | c |
| FVB/N | 31 | 2 | D | 3.2 | c |
| FVB/N | 31 | 3 | D | 2.5 | c |
| FVB/N | 31 | 4 | P | 1.7 | c |
| FVB/N | 31 | 5 | P | 1.8 | c |
| FVB/N | 31 | 6 | D | 1.8 | c |
| FVB/N | 31 | 7 | D | 1.7 | c |
| FVB/N | 31 | 8 | P | 2.6 | c |
| FVB/N | 31 | 9 | M | 2.7 | c |
| FVB/N | 31 | 10 | D | 5.4 | c |
| FVB/N | 31 | 11 | P | 2 | c |
| FVB/N | 32 | 1 | D | 3 | c |
| FVB/N | 32 | 2 | P | 3.7 | c |
| FVB/N | 32 | 3 | E | 9.4 | o |
| FVB/N | 32 | 4 | E | 6.6 | c |
| FVB/N | 32 | 5 | M | 6.2 | c |
| FVB/N | 32 | 6 | D | 4.5 | c |
| FVB/N | 32 | 7 | D | 2 | c |
| FVB/N | 32 | 8 | P | 9.2 | c |
| FVB/N | 32 | 9 | E | 20.3 | c |
| FVB/N | 32 | 10 | D | 3.7 | c |
| FVB/N | 32 | 11 | D | 3.2 | o |
| FVB/N | 33 | 1 | E | 29 | o |
| FVB/N | 33 | 2 | M | 2.6 | o |
| FVB/N | 33 | 3 | D | 2.3 | c |
| FVB/N | 33 | 4 | D | 3.5 | c |
| FVB/N | 33 | 5 | P | 13.2 | o |
| FVB/N | 33 | 6 | E | 28.5 | c |
| FVB/N | 33 | 7 | M | 3.8 | o |
| FVB/N | 33 | 8 | D | 4.7 | c |
| FVB/N | 33 | 9 | P | 2.7 | c |
| FVB/N | 33 | 10 | E | 14.6 | c |
| FVB/N | 33 | 11 | E | 10 | o |
| FVB/N | 34 | 1 | P | 8.8 | o |
| FVB/N | 34 | 2 | E | 30 | c |
| FVB/N | 34 | 3 | M | 5.2 | o |
| FVB/N | 34 | 4 | D | 5.2 | c |
| FVB/N | 34 | 5 | D | 4.1 | c |
| FVB/N | 34 | 6 | P | 14.5 | o |
| FVB/N | 34 | 7 | E | 20 | c |
| FVB/N | 34 | 8 | E | 28 | o |
| FVB/N | 34 | 9 | M | 2.6 | c |
| FVB/N | 34 | 10 | D | 3.5 | c |
| FVB/N | 34 | 11 | P | 4.1 | o |
| FVB/N | 35 | 1 | P | 4.5 | o |
| FVB/N | 35 | 2 | P | 21.6 | o |
| FVB/N | 35 | 3 | E | 30 | o |
| FVB/N | 35 | 4 | M | 3.5 | c |
| FVB/N | 35 | 5 | D | 3 | c |
| FVB/N | 35 | 6 | D | 2.9 | c |
| FVB/N | 35 | 7 | P | 4.8 | o |
| FVB/N | 35 | 8 | E | 10.7 | c |
| FVB/N | 35 | 9 | E | 22.5 | c |
| FVB/N | 35 | 10 | M | 4.5 | c |
| FVB/N | 35 | 11 | D | 4.4 | c |
| FVB/N | 41 | 1 | E | 24.7 | c |
| FVB/N | 41 | 2 | M | 6.7 | o |
| FVB/N | 41 | 3 | D | 4.9 | c |
| FVB/N | 41 | 4 | D | 3.3 | c |
| FVB/N | 41 | 5 | D | 2.1 | c |
| FVB/N | 41 | 6 | P | 3.6 | c |
| FVB/N | 41 | 7 | E | 18.3 | o |
| FVB/N | 41 | 8 | M | 2.7 | c |
| FVB/N | 41 | 9 | D | 2 | c |
| FVB/N | 41 | 10 | D | 2.9 | c |
| FVB/N | 41 | 11 | D | 2.9 | c |
| FVB/N | 42 | 1 | P | 16.9 | o |
| FVB/N | 42 | 2 | E | 28.5 | c |
| FVB/N | 42 | 3 | M | 5.4 | c |
| FVB/N | 42 | 4 | D | 3.4 | c |
| FVB/N | 42 | 5 | P | 9.9 | c |
| FVB/N | 42 | 6 | P | 12.9 | c |
| FVB/N | 42 | 7 | E | 23.2 | o |
| FVB/N | 42 | 8 | E | 7.4 | c |
| FVB/N | 42 | 9 | M | 6.7 | c |
| FVB/N | 42 | 10 | D | 3.7 | c |
| FVB/N | 42 | 11 | P | 5.5 | o |
| FVB/N | 43 | 1 | D | 3.3 | c |
| FVB/N | 43 | 2 | D | 2.4 | c |
| FVB/N | 43 | 3 | P | 3.4 | c |
| FVB/N | 43 | 4 | E | 22.8 | c |
| FVB/N | 43 | 5 | E | 9.8 | o |
| FVB/N | 43 | 6 | M | 2.3 | c |
| FVB/N | 43 | 7 | D | 2.4 | o |
| FVB/N | 43 | 8 | D | 2.1 | c |
| FVB/N | 43 | 9 | P | 6 | c |
| FVB/N | 43 | 10 | E | 26.2 | c |
| FVB/N | 43 | 11 | E | 11.2 | o |
| FVB/N | 44 | 1 | D | 3.6 | c |
| FVB/N | 44 | 2 | P | 9.5 | c |
| FVB/N | 44 | 3 | E | 18.2 | o |
| FVB/N | 44 | 4 | E | 5.3 | c |
| FVB/N | 44 | 5 | M | 4.5 | c |
| FVB/N | 44 | 6 | D | 2.8 | c |
| FVB/N | 44 | 7 | P | 2.5 | c |
| FVB/N | 44 | 8 | P | 26.8 | c |
| FVB/N | 44 | 9 | E | 28.4 | o |
| FVB/N | 44 | 10 | M | 4.8 | c |
| FVB/N | 44 | 11 | D | 3.3 | o |
| FVB/N | 45 | 1 | D | 4.7 | c |
| FVB/N | 45 | 2 | P | 2.6 | c |
| FVB/N | 45 | 3 | P | 9.6 | o |
| FVB/N | 45 | 4 | E | 20 | c |
| FVB/N | 45 | 5 | M | 5.7 | o |
| FVB/N | 45 | 6 | D | 2.6 | c |
| FVB/N | 45 | 7 | P | 4.8 | o |
| FVB/N | 45 | 8 | E | 19.5 | c |
| FVB/N | 45 | 9 | E | 23.9 | c |
| FVB/N | 45 | 10 | M | 5.6 | o |
| FVB/N | 45 | 11 | D | 3.2 | c |

| Strain | Mouse ID | DAY | STAGE (lavage) | AR (kOm) (MEDPro) | Vagina |
| --- | --- | --- | --- | --- | --- |
| C57Bl6/J | 51 | 1 | M | 4.1 | o |
| C57Bl6/J | 51 | 2 | M | 6 | c |
| C57Bl6/J | 51 | 3 | M | 2.9 | c |
| C57Bl6/J | 51 | 4 | D | 2.8 | c |
| C57Bl6/J | 51 | 5 | D | 2.8 | c |
| C57Bl6/J | 51 | 6 | D | 2.9 | c |
| C57Bl6/J | 51 | 7 | D | 5.5 | c |
| C57Bl6/J | 51 | 8 | P | 14.2 | c |
| C57Bl6/J | 51 | 9 | P | 5.7 | o |
| C57Bl6/J | 51 | 10 | E | 20.4 | c |
| C57Bl6/J | 51 | 11 | E | 22 | c |
| C57Bl6/J | 52 | 1 | E | 23.2 | o |
| C57Bl6/J | 52 | 2 | E | 18.4 | o |
| C57Bl6/J | 52 | 3 | M | 3.8 | c |
| C57Bl6/J | 52 | 4 | D | 2.6 | c |
| C57Bl6/J | 52 | 5 | D | 3.5 | c |
| C57Bl6/J | 52 | 6 | D | 5.9 | c |
| C57Bl6/J | 52 | 7 | E | 16 | c |
| C57Bl6/J | 52 | 8 | E | 28.2 | c |
| C57Bl6/J | 52 | 9 | E | 18.8 | o |
| C57Bl6/J | 52 | 10 | M | 5.5 | c |
| C57Bl6/J | 52 | 11 | D | 2.7 | c |
| C57Bl6/J | 53 | 1 | P | 6.3 | c |
| C57Bl6/J | 53 | 2 | E | 20.1 | c |
| C57Bl6/J | 53 | 3 | E | 18.4 | c |
| C57Bl6/J | 53 | 4 | M | 4.9 | c |
| C57Bl6/J | 53 | 5 | D | 5.3 | c |
| C57Bl6/J | 53 | 6 | P | 2.7 | c |
| C57Bl6/J | 53 | 7 | E | 17.8 | o |
| C57Bl6/J | 53 | 8 | E | 21.4 | c |
| C57Bl6/J | 53 | 9 | E | 8.4 | o |
| C57Bl6/J | 53 | 10 | E | 8.2 | c |
| C57Bl6/J | 53 | 11 | M | 4.6 | c |
| C57Bl6/J | 54 | 1 | P | 7.5 | c |
| C57Bl6/J | 54 | 2 | E | 16.8 | c |
| C57Bl6/J | 54 | 3 | M | 9.8 | c |
| C57Bl6/J | 54 | 4 | D | 5.2 | c |
| C57Bl6/J | 54 | 5 | D | 3.7 | c |
| C57Bl6/J | 54 | 6 | P | 3 | c |
| C57Bl6/J | 54 | 7 | P | 13.9 | o |
| C57Bl6/J | 54 | 8 | E | 19.3 | c |
| C57Bl6/J | 54 | 9 | E | 17.8 | c |
| C57Bl6/J | 54 | 10 | E | 19.9 | c |
| C57Bl6/J | 54 | 11 | M | 5.1 | c |
| C57Bl6/J | 55 | 1 | E | 17 | c |
| C57Bl6/J | 55 | 2 | E | 26.3 | o |
| C57Bl6/J | 55 | 3 | E | 20.3 | c |
| C57Bl6/J | 55 | 4 | M | 6.1 | c |
| C57Bl6/J | 55 | 5 | D | 2.8 | c |
| C57Bl6/J | 55 | 6 | D | 1.8 | c |
| C57Bl6/J | 55 | 7 | P | 4.3 | o |
| C57Bl6/J | 55 | 8 | E | 28.1 | c |
| C57Bl6/J | 55 | 9 | E | 21.9 | o |
| C57Bl6/J | 55 | 10 | E | 15.1 | c |
| C57Bl6/J | 55 | 11 | M | 7.2 | c |
| C57Bl6/J | 61 | 1 | P | 1.6 | c |
| C57Bl6/J | 61 | 2 | P | 1.5 | c |
| C57Bl6/J | 61 | 3 | D | 1.6 | c |
| C57Bl6/J | 61 | 4 | D | 1.8 | c |
| C57Bl6/J | 61 | 5 | D | 2.1 | c |
| C57Bl6/J | 61 | 6 | D | 2 | c |
| C57Bl6/J | 61 | 7 | D | 2.2 | c |
| C57Bl6/J | 61 | 8 | D | 1.9 | c |
| C57Bl6/J | 61 | 9 | D | 2.1 | c |
| C57Bl6/J | 61 | 10 | D | 1.8 | c |
| C57Bl6/J | 61 | 11 | D | 1.7 | c |
| C57Bl6/J | 62 | 1 | M | 3.4 | c |
| C57Bl6/J | 62 | 2 | M | 4.2 | o |
| C57Bl6/J | 62 | 3 | D | 3.9 | c |
| C57Bl6/J | 62 | 4 | D | 4.7 | c |
| C57Bl6/J | 62 | 5 | D | 5.5 | c |
| C57Bl6/J | 62 | 6 | D | 2.9 | c |
| C57Bl6/J | 62 | 7 | E | 15 | o |
| C57Bl6/J | 62 | 8 | E | 12.1 | c |
| C57Bl6/J | 62 | 9 | E | 7.3 | o |
| C57Bl6/J | 62 | 10 | E | 11.3 | c |
| C57Bl6/J | 62 | 11 | M | 1.7 | c |
| C57Bl6/J | 63 | 1 | M | 6.8 | c |
| C57Bl6/J | 63 | 2 | M | 5.7 | c |
| C57Bl6/J | 63 | 3 | M | 5.4 | c |
| C57Bl6/J | 63 | 4 | D | 3.9 | c |
| C57Bl6/J | 63 | 5 | D | 4.9 | c |
| C57Bl6/J | 63 | 6 | P | 3.8 | o |
| C57Bl6/J | 63 | 7 | E | 9.8 | o |
| C57Bl6/J | 63 | 8 | E | 30.8 | o |
| C57Bl6/J | 63 | 9 | E | 25.5 | c |
| C57Bl6/J | 63 | 10 | E | 13.4 | c |
| C57Bl6/J | 63 | 11 | E | 28.3 | c |
| C57Bl6/J | 64 | 1 | M | 5.3 | c |
| C57Bl6/J | 64 | 2 | M | 8.1 | c |
| C57Bl6/J | 64 | 3 | D | 3.6 | c |
| C57Bl6/J | 64 | 4 | D | 4.5 | c |
| C57Bl6/J | 64 | 5 | P | 15 | c |
| C57Bl6/J | 64 | 6 | E | 11.8 | o |
| C57Bl6/J | 64 | 7 | E | 9.8 | o |
| C57Bl6/J | 64 | 8 | E | 28.4 | o |
| C57Bl6/J | 64 | 9 | E | 10.7 | o |
| C57Bl6/J | 64 | 10 | E | 14.5 | c |
| C57Bl6/J | 64 | 11 | M | 10.4 | c |
| C57Bl6/J | 65 | 1 | M | 10.1 | c |
| C57Bl6/J | 65 | 2 | M | 7.6 | c |
| C57Bl6/J | 65 | 3 | M | 5.2 | c |
| C57Bl6/J | 65 | 4 | D | 4.2 | c |
| C57Bl6/J | 65 | 5 | D | 3.3 | c |
| C57Bl6/J | 65 | 6 | P | 2.7 | c |
| C57Bl6/J | 65 | 7 | E | 14.9 | c |
| C57Bl6/J | 65 | 8 | E | 22.5 | o |
| C57Bl6/J | 65 | 9 | E | 13.6 | c |
| C57Bl6/J | 65 | 10 | E | 8 | c |
| C57Bl6/J | 65 | 11 | M | 5.9 | c |

**Supplementary Table 2.** The test results for locomotor activity and "emotionality" of Swiss female mice. The tests were conducted on intact female Swiss mice (n=21 - Table S2a) and 30 minutes after either vaginal AR measurements (n=21 - Table S2b) or vaginal lavage collection (n=14 - Table S2c).

*Notations:*

VER - vertical activity count; HOR - horizontal activity count; AMB - ambulations.

Table S2a

| ID | GROUP | Weight | Locomotor activity | | | fecal boli |
| --- | --- | --- | --- | --- | --- | --- |
| VER | HOR | AMB |
| 1 | intact | 36 | 114 | 892 | 442 | 8 |
| 2 | intact | 36 | 70 | 803 | 357 | 6 |
| 3 | intact | 29,1 | 39 | 807 | 494 | 4 |
| 4 | intact | 39,9 | 36 | 570 | 338 | 11 |
| 5 | intact | 34,2 | 60 | 813 | 531 | 3 |
| 6 | intact | 38,7 | 17 | 436 | 283 | 12 |
| 7 | intact | 40,6 | 153 | 627 | 373 | 7 |
| 8 | intact | 43,6 | 86 | 453 | 257 | 16 |
| 9 | intact | 34,3 | 78 | 533 | 304 | 7 |
| 10 | intact | 29,6 | 72 | 840 | 166 | 13 |
| 11 | intact | 31,1 | 129 | 670 | 428 | 15 |
| 12 | intact | 31,9 | 162 | 584 | 314 | 14 |
| 13 | intact | 33,9 | 95 | 565 | 334 | 18 |
| 14 | intact | 34,7 | 83 | 638 | 338 | 12 |
| 15 | intact | 38,1 | 10 | 387 | 221 | 6 |
| 16 | intact | 35,7 | 50 | 672 | 318 | 11 |
| 17 | intact | 40,4 | 162 | 757 | 434 | 9 |
| 18 | intact | 31,8 | 75 | 427 | 209 | 6 |
| 19 | intact | 34,3 | 41 | 534 | 313 | 14 |
| 20 | intact | 29,8 | 54 | 520 | 305 | 6 |
| 21 | intact | 39,2 | 64 | 696 | 410 | 9 |

Table S2b

| ID | GROUP | Weight | Locomotor activity | | | fecal boli |
| --- | --- | --- | --- | --- | --- | --- |
| VER | HOR | AMB |
| 101 | MEDPro | 41,1 | 136 | 348 | 199 | 11 |
| 102 | MEDPro | 47,2 | 132 | 528 | 241 | 7 |
| 103 | MEDPro | 34,3 | 58 | 496 | 266 | 11 |
| 104 | MEDPro | 33 | 58 | 1175 | 813 | 9 |
| 105 | MEDPro | 32,7 | 71 | 653 | 356 | 7 |
| 106 | MEDPro | 27 | 121 | 1010 | 647 | 5 |
| 107 | MEDPro | 34,6 | 79 | 444 | 237 | 13 |
| 108 | MEDPro | 32,4 | 55 | 446 | 260 | 6 |
| 109 | MEDPro | 35,2 | 210 | 466 | 251 | 7 |
| 110 | MEDPro | 36,3 | 222 | 432 | 253 | 9 |
| 111 | MEDPro | 40,7 | 28 | 352 | 225 | 4 |
| 112 | MEDPro | 33,7 | 147 | 710 | 489 | 12 |
| 113 | MEDPro | 26.9 | 16 | 390 | 229 | 6 |
| 114 | MEDPro | 30.9 | 81 | 379 | 205 | 9 |
| 115 | MEDPro | 37,9 | 89 | 435 | 238 | 6 |
| 116 | MEDPro | 38,2 | 88 | 660 | 273 | 4 |
| 117 | MEDPro | 32 | 75 | 526 | 293 | 15 |
| 118 | MEDPro | 37,3 | 79 | 526 | 237 | 10 |
| 119 | MEDPro | 36,3 | 100 | 476 | 259 | 4 |
| 120 | MEDPro | 35,3 | 188 | 479 | 269 | 7 |
| 121 | MEDPro | 35,5 | 198 | 438 | 265 | 6 |

Table S2c

| ID | GROUP | Weight | Locomotor activity | | | fecal boli |
| --- | --- | --- | --- | --- | --- | --- |
| VER | HOR | AMB |
| 201 | lavage | 45,6 | 85 | 310 | 157 | 11 |
| 202 | lavage | 47,1 | 155 | 754 | 432 | 13 |
| 203 | lavage | 44 | 6 | 237 | 98 | 13 |
| 204 | lavage | 46,1 | 122 | 450 | 259 | 10 |
| 205 | lavage | 32,6 | 72 | 464 | 248 | 13 |
| 206 | lavage | 33,2 | 69 | 650 | 398 | 10 |
| 207 | lavage | 34 | 30 | 376 | 203 | 8 |
| 208 | lavage | 36,6 | 46 | 365 | 173 | 11 |
| 209 | lavage | 29,8 | 103 | 722 | 395 | 12 |
| 210 | lavage | 33,8 | 17 | 470 | 267 | 16 |
| 211 | lavage | 30,4 | 19 | 445 | 236 | 3 |
| 212 | lavage | 33,3 | 15 | 446 | 243 | 12 |
| 213 | lavage | 37,8 | 89 | 611 | 364 | 7 |
| 214 | lavage | 37,3 | 2 | 176 | 78 | 11 |
